# Supplementary material for: Graphitic nitrogen induced identical fluorescent emission of carbon dots for scalable anti-counterfeiting applications
Source: Royal Society of Chemistry journal article supplement (doi:10.1039/d4ta07743a), 2024-11-28
Supplement: d4ta07743a1.pdf [file d4ta07743a1.pdf]

## Supporting Information

# Graphitic Nitrogen Induced Identical Fluorescent Emission of Carbon Dots for Scalable Anti-Counterfeiting Applications

Channa Wang, Fuzhu Liu, Mingjin Du, Mi Zhang, Xiangdong Ding\* and Changsheng  
Xiang\*

State Key Laboratory for Mechanical Behavior of Materials, Xi'an Jiaotong University,  
Xi'an 710049, China. Email: dingxd@mail.xjtu.edu.cn, c.xiang@xjtu.edu.cn

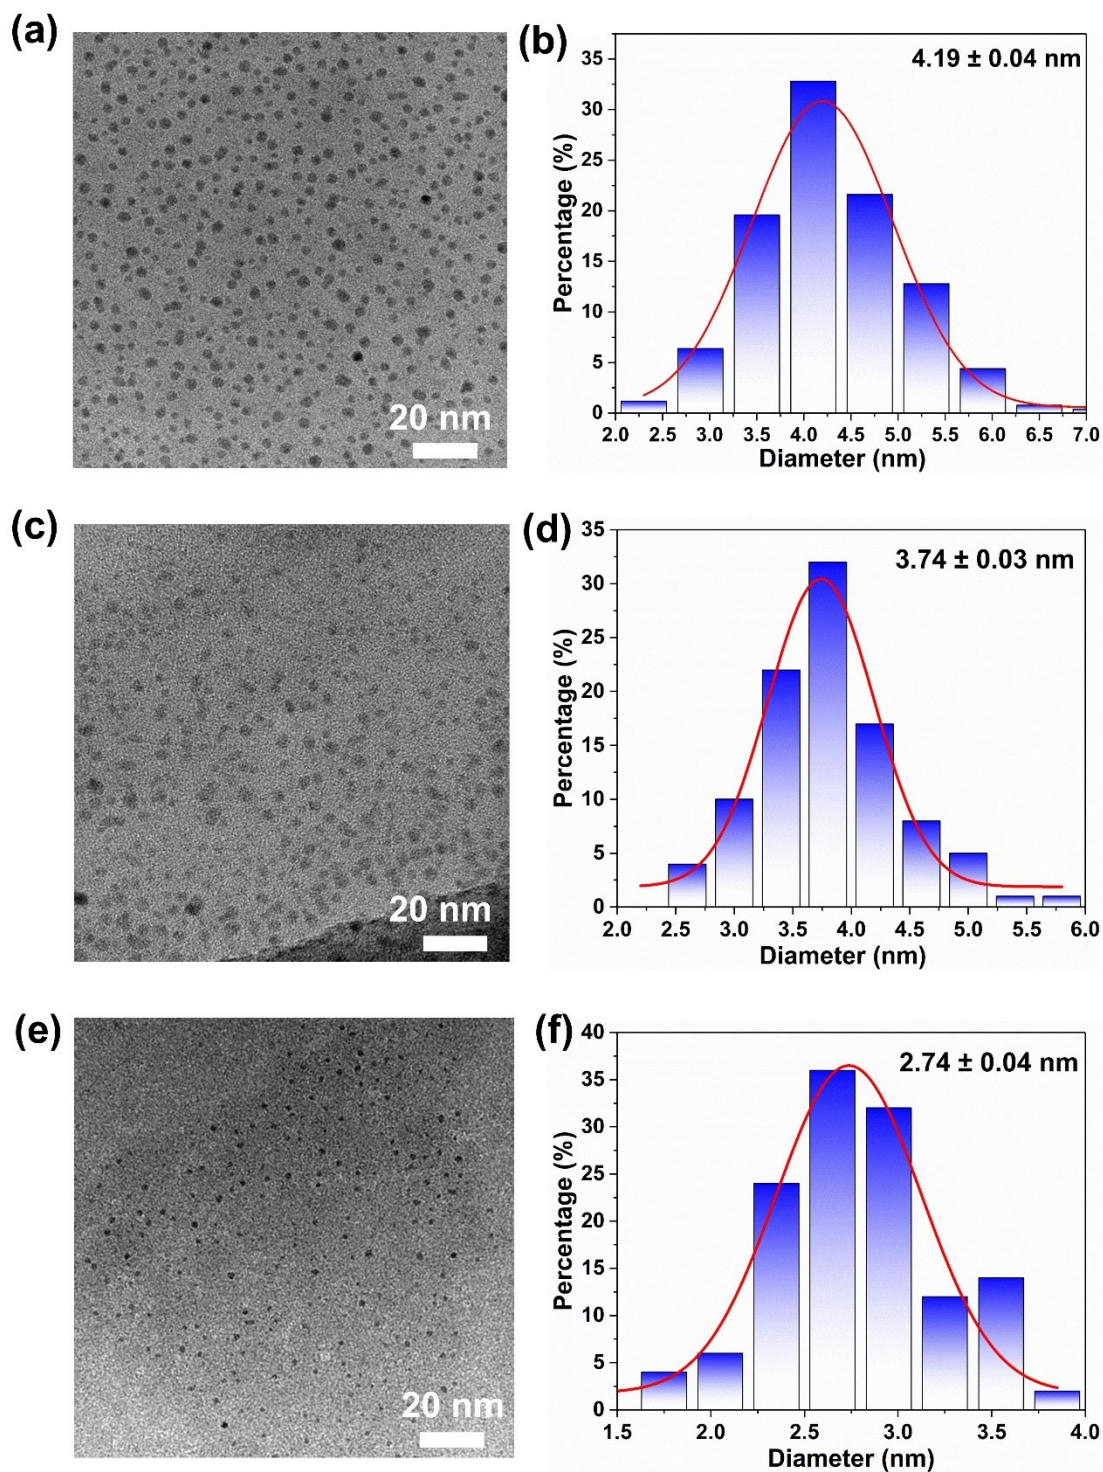

**Fig. S1** TEM images of (a) N-CDs-1, (c) N-CDs-2 and (e) N-CDs-3. Size distributions of (b) N-CDs-1, (d) N-CDs-2 and (f) N-CDs-3.

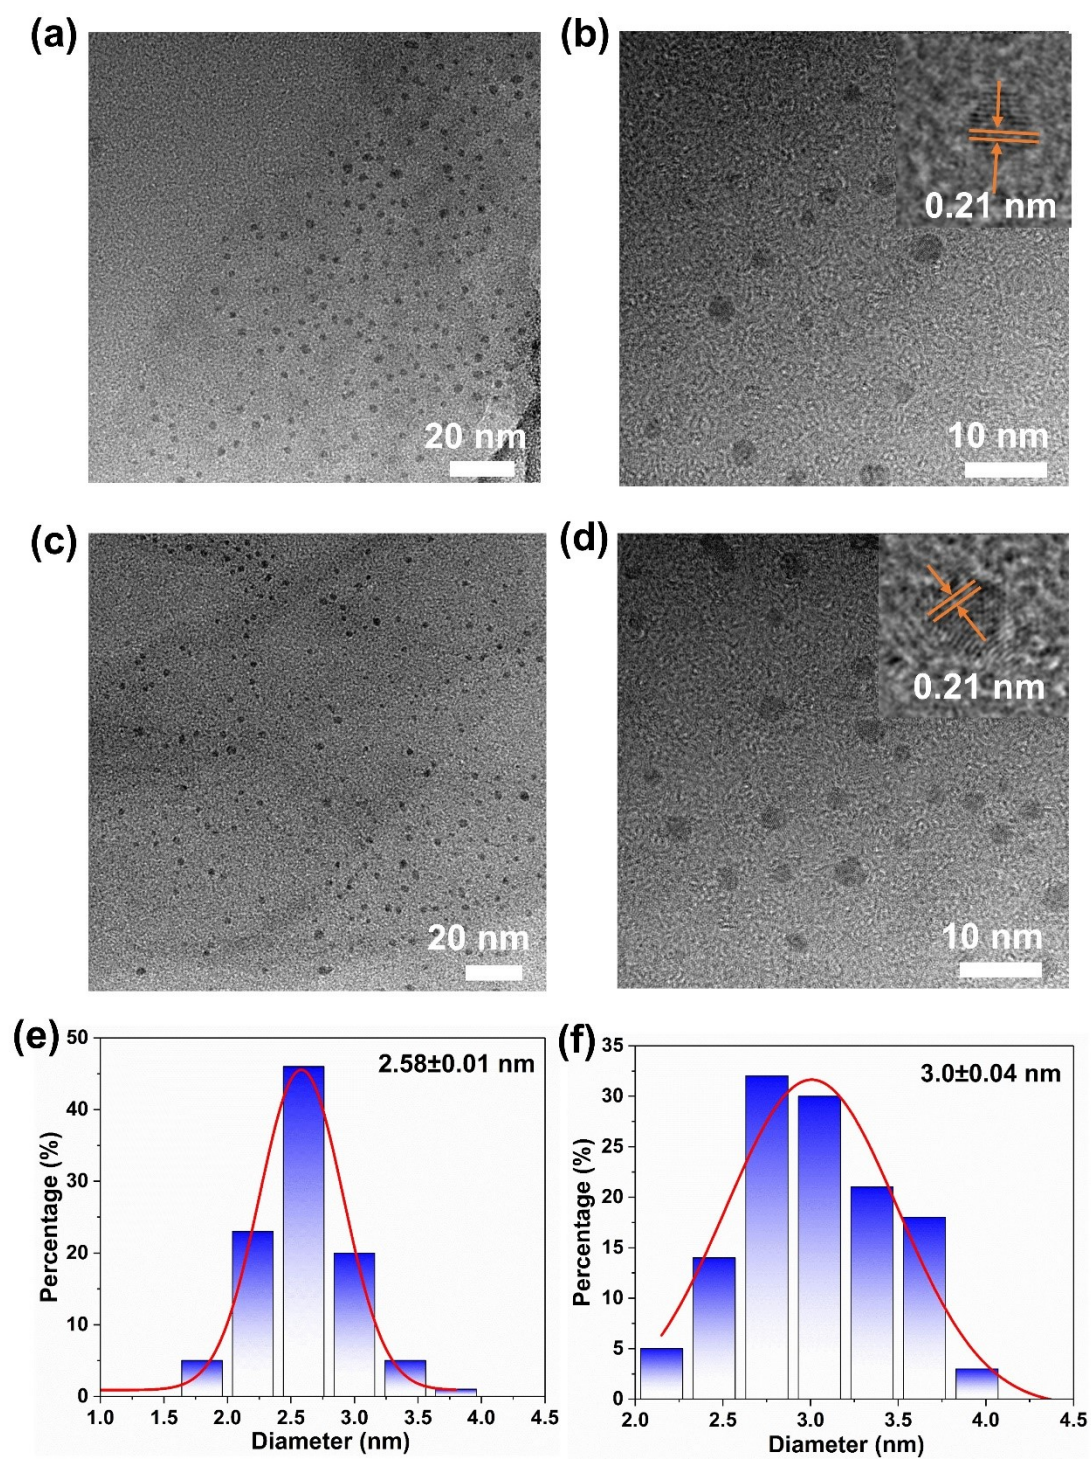

**Fig. S2** TEM images of (a), (b) r-CDs-1 and (c), (d) r-CDs-2. Size distributions of (e) r-CDs-1 and (f) r-CDs-2.

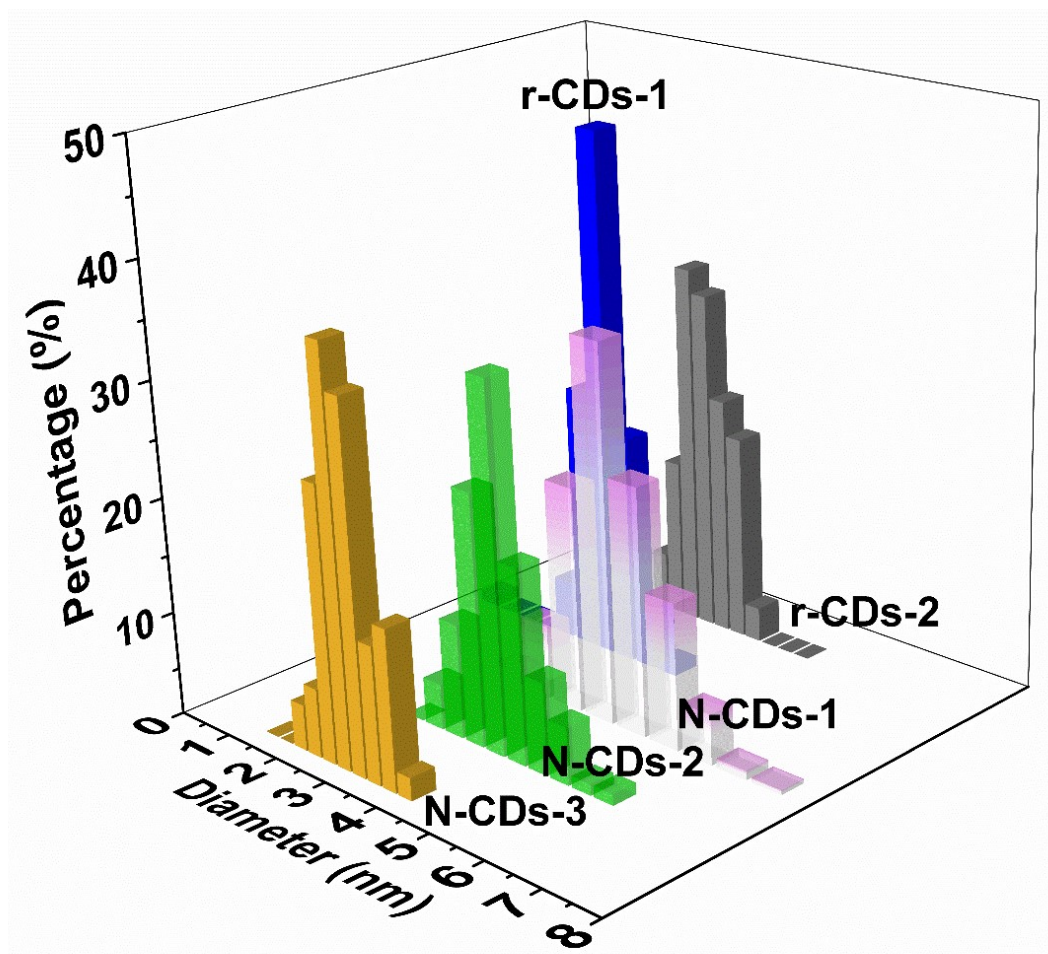

Fig. S3 Summary chart of the size distribution results.

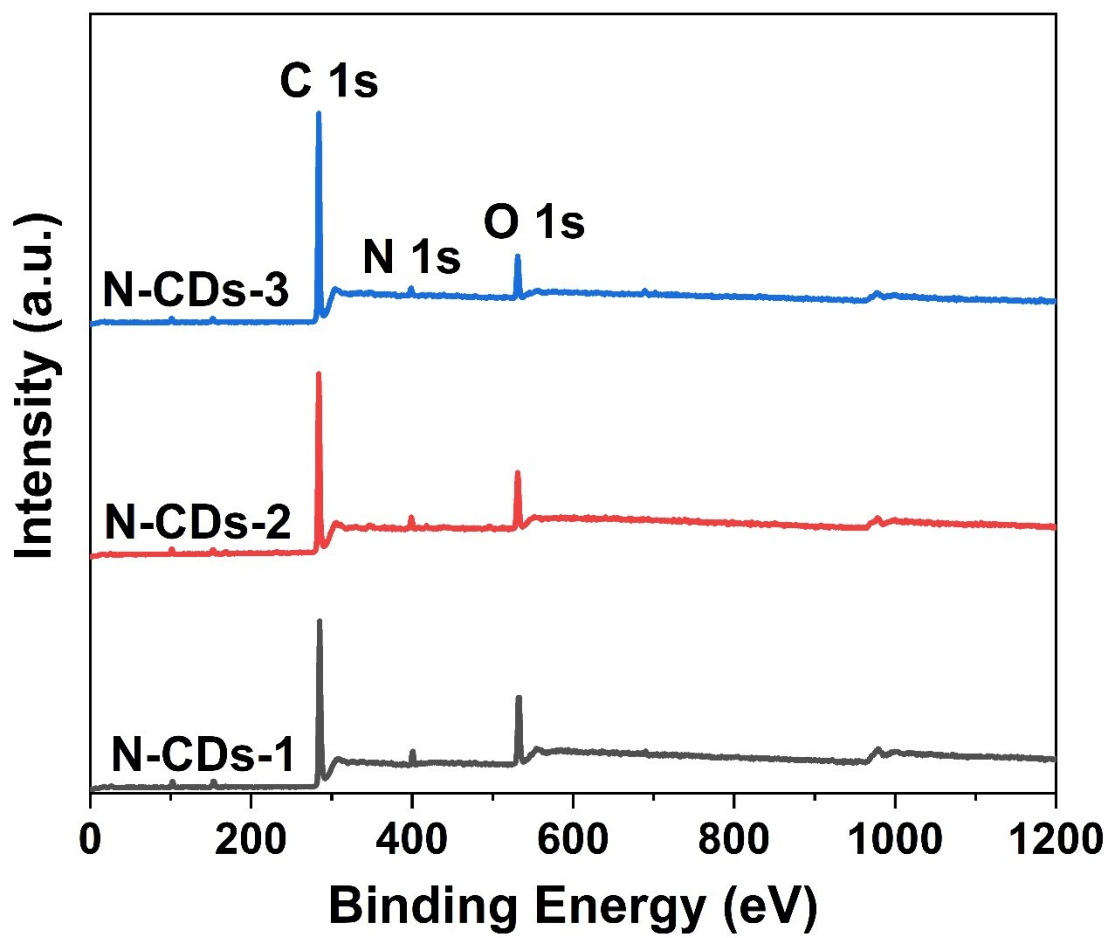

Fig. S4 XPS scan spectra of three N-CDs.

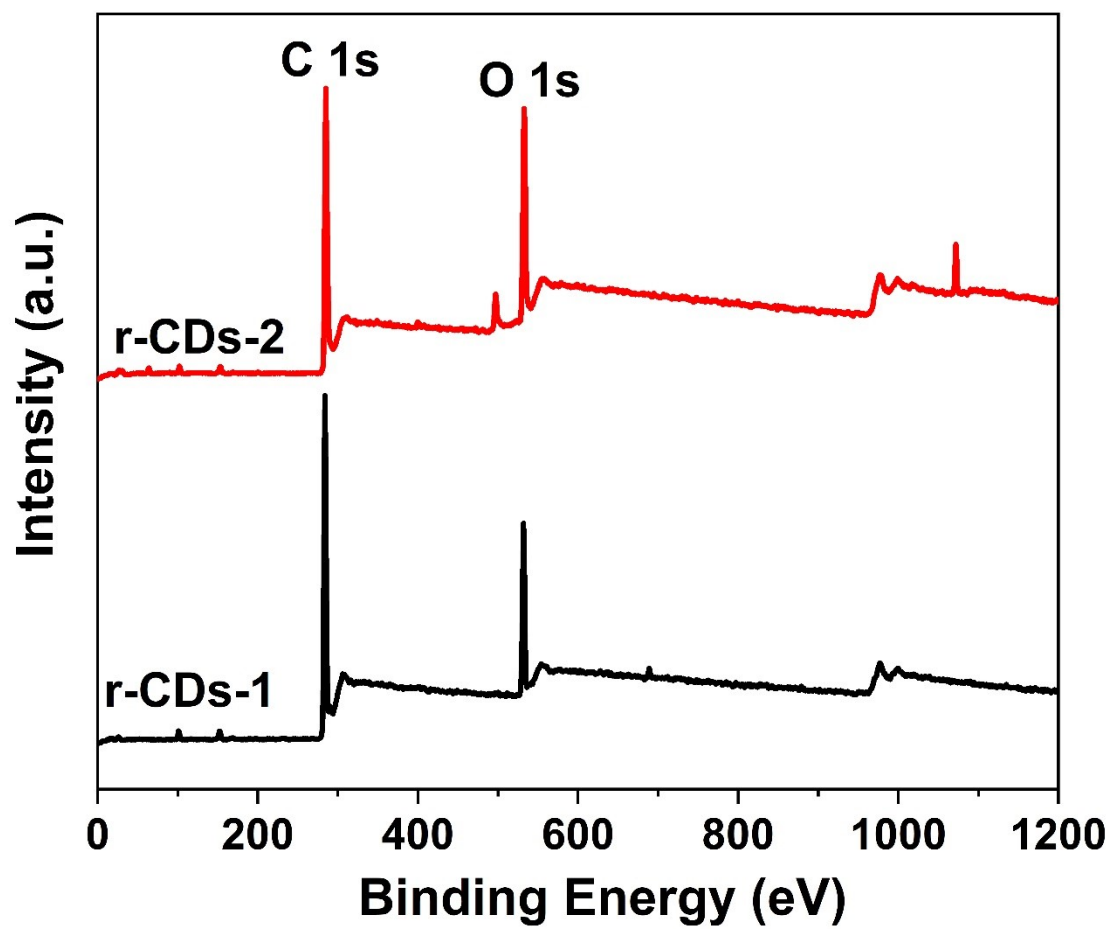

Fig. S5 XPS scan spectra of two r-CDs.

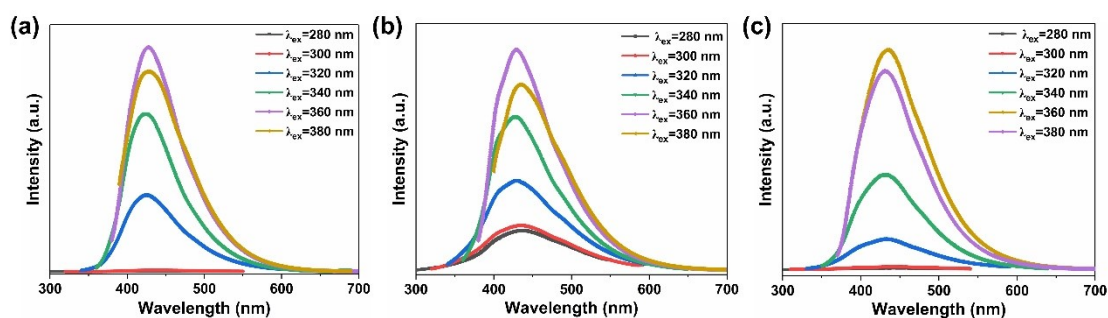

**Fig. S6** The PL spectra of (a) N-CDs-1, (b) N-CDs-2, and (c) N-CDs-3, under different excitation wavelengths.

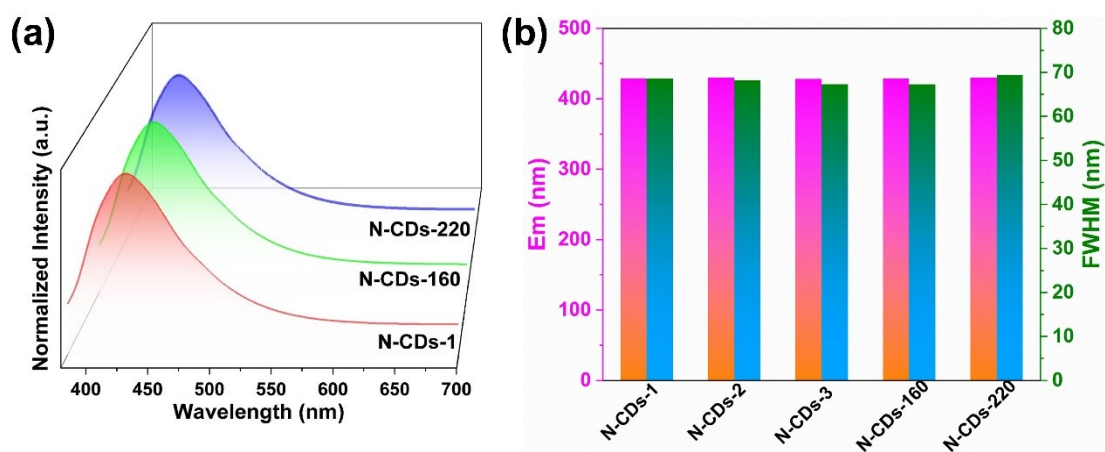

**Fig. S7** (a) The PL spectra of N-CDs-1, N-CDs-160, and N-CDs-220, under 365 nm excitation wavelengths. (b) The summary of the emission peak and full width at half maximum (FWHM) of N-CDs under different pH and reaction temperatures.

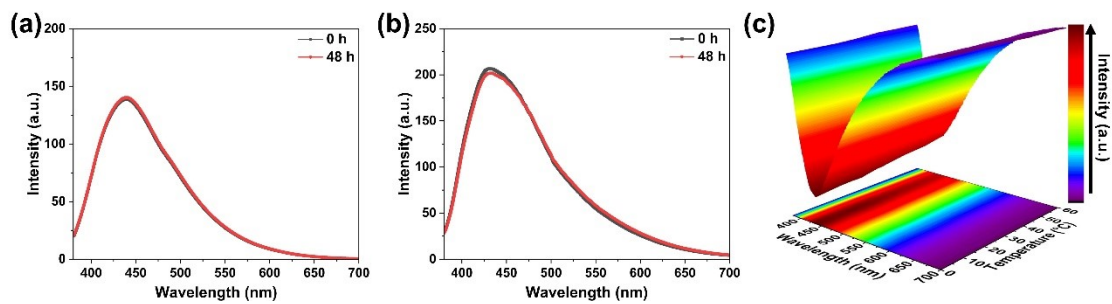

**Fig. S8** (a) The PL spectra of N-CDs-1 was measured after 48 h, at pH = 0.76. (b) The PL spectra of N-CDs-1 was measured after 48 h, at 50 °C. (c) The temperature-dependent PL 3D spectra of N-CDs-1 in ethanol (0–60 °C).

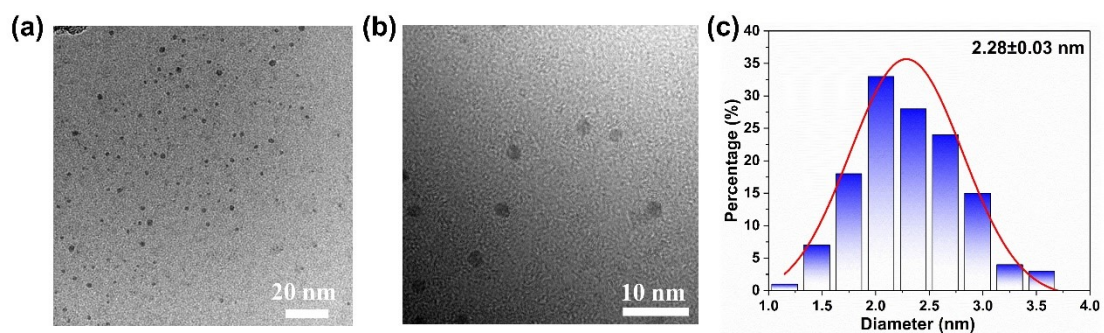

**Fig. S9** TEM images of (a), (b) N-CDs-4. Size distributions of (c) N-CDs-4. More than 200 particles are counted for these distributions.



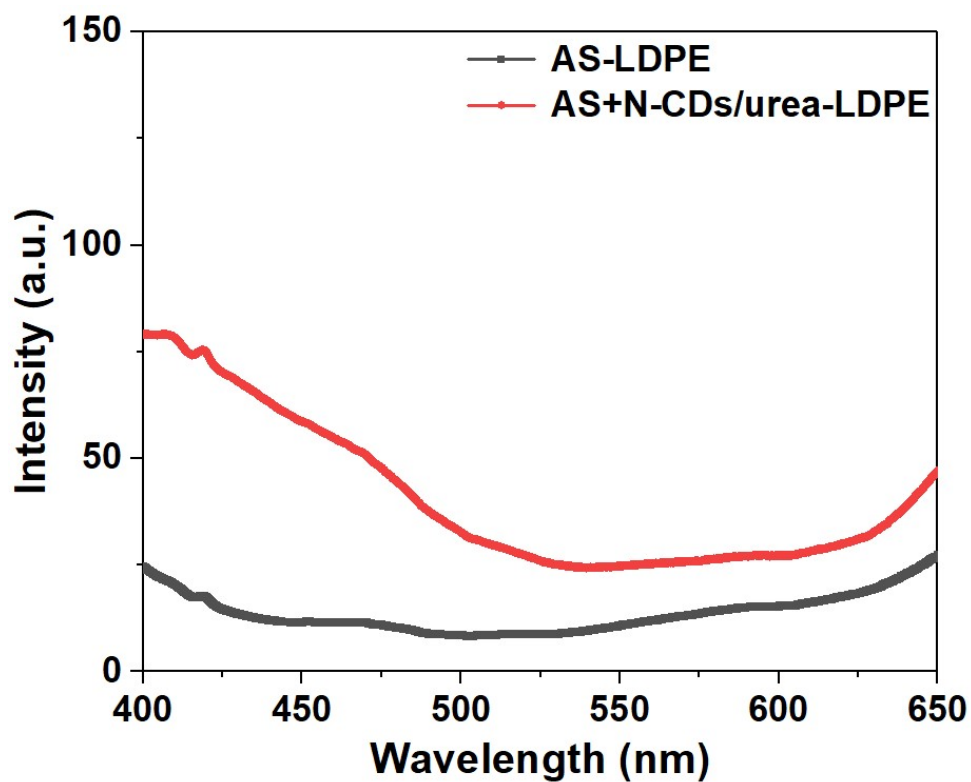

**Fig. S10** The PL spectra of AS and AS+N-CDs/urea coated on LDPE under 365 nm excitation wavelengths.

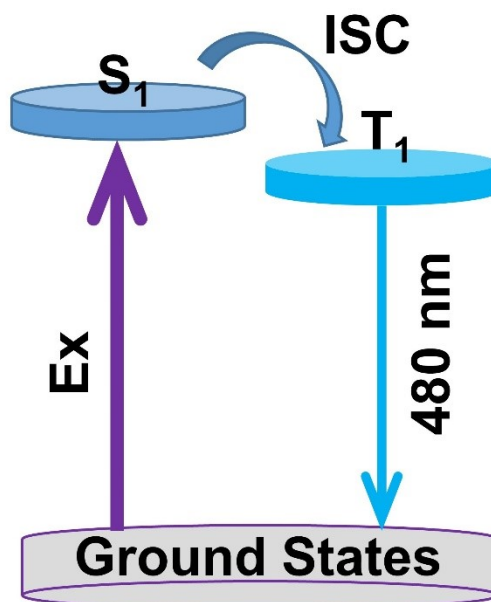

**Fig. S11** Proposed phosphorescence emission processes of N-CDs/urea (Ground state,  $S_1$ : First excited singlet state,  $T_1$ : First excited triplet state).

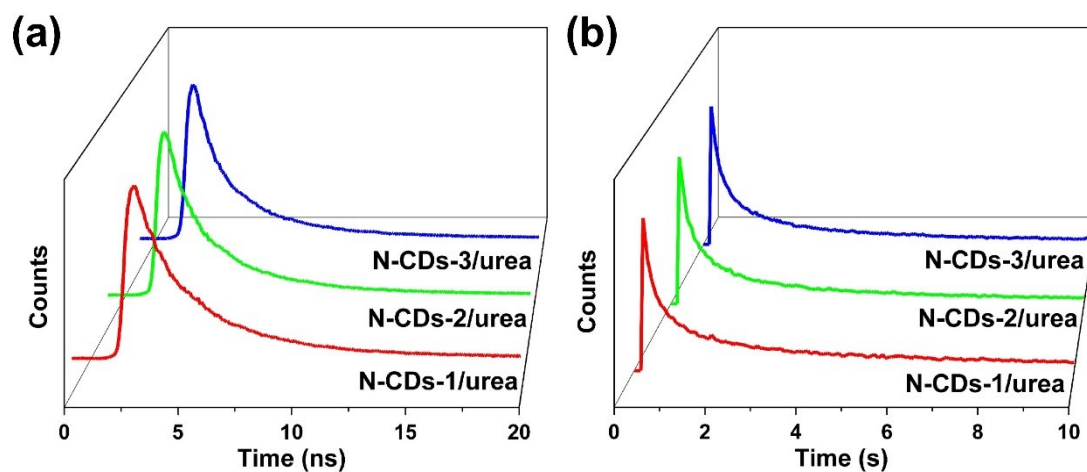

**Fig. S12** Time-resolved decay spectra of N-CDs/urea measured at 404 nm: (a) fluorescence, (b) phosphorescence.

**Table S1** XPS data analysis of full spectra of N-CDs and r-CDs.

| Samples | C (at.%) | N (at.%) | O (at.%) |
|---------|----------|----------|----------|
| N-CDs-1 | 79.24    | 4.65     | 16.11    |
| N-CDs-2 | 83.29    | 4.28     | 12.43    |
| N-CDs-3 | 86.51    | 3.01     | 10.48    |
| r-CDs-1 | 75.85    | -        | 24.15    |
| r-CDs-2 | 82.91    | -        | 17.09    |

**Table S2** XPS data analysis of C 1s spectra of N-CDs and r-CDs.

| Samples | C=C/C-C (%) | C-N (%) | C-O (%) | C=N (%) |
|---------|-------------|---------|---------|---------|
| N-CDs-1 | 61.49       | 13.25   | 19.49   | 5.77    |
| N-CDs-2 | 62.03       | 18.99   | 13.99   | 4.99    |
| N-CDs-3 | 64.47       | 18.46   | 12.57   | 4.50    |
| r-CDs-1 | 62.01       | -       | 37.99   | -       |
| r-CDs-2 | 71.99       | -       | 28.01   | -       |

**Table S3** XPS data analysis of N 1s spectra of N-CDs.

| Samples | Graphitic N (%) | Pyridinic N (%) |
|---------|-----------------|-----------------|
| N-CDs-1 | 48.60           | 51.40           |
| N-CDs-2 | 42.76           | 57.24           |
| N-CDs-3 | 48.53           | 51.47           |

**Table S4** Elemental analysis results of N-CDs.

| Samples | C (wt.%) | N (wt.%) | H (wt.%) | O* (wt.%) |
|---------|----------|----------|----------|-----------|
| N-CDs-1 | 53.93    | 10.61    | 4.68     | 30.78     |
| N-CDs-2 | 45.21    | 7.54     | 4.45     | 42.80     |

\*:by difference.
